# Supplementary material
Source: PubMed Central journal article supplement (PMC6107563)
Supplement: rstb20170295supp1.pdf [file rstb20170295supp1.pdf]

## Supplementary material

### Linking cognition with fitness in a wild primate: Fitness correlates of problem-solving performance and spatial learning ability

Franziska Huebner, Claudia Fichtel, Peter M. Kappeler

Phil. Trans. R. Soc. B., 2018, 20170295.

## Figures

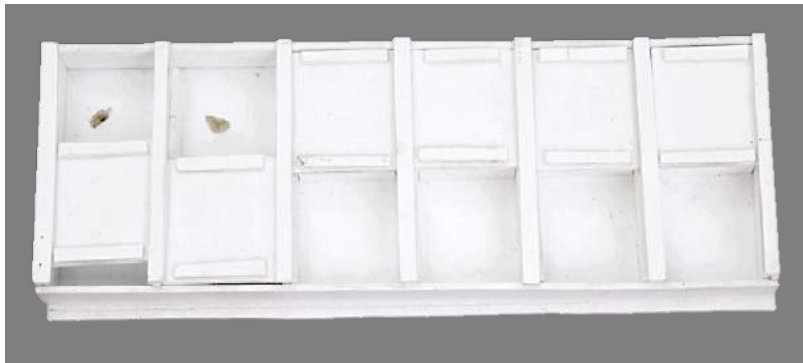

**Figure S1: The food extraction task:** Body width of a mouse lemur corresponds to the width of one compartment (5 x 4.5cm).

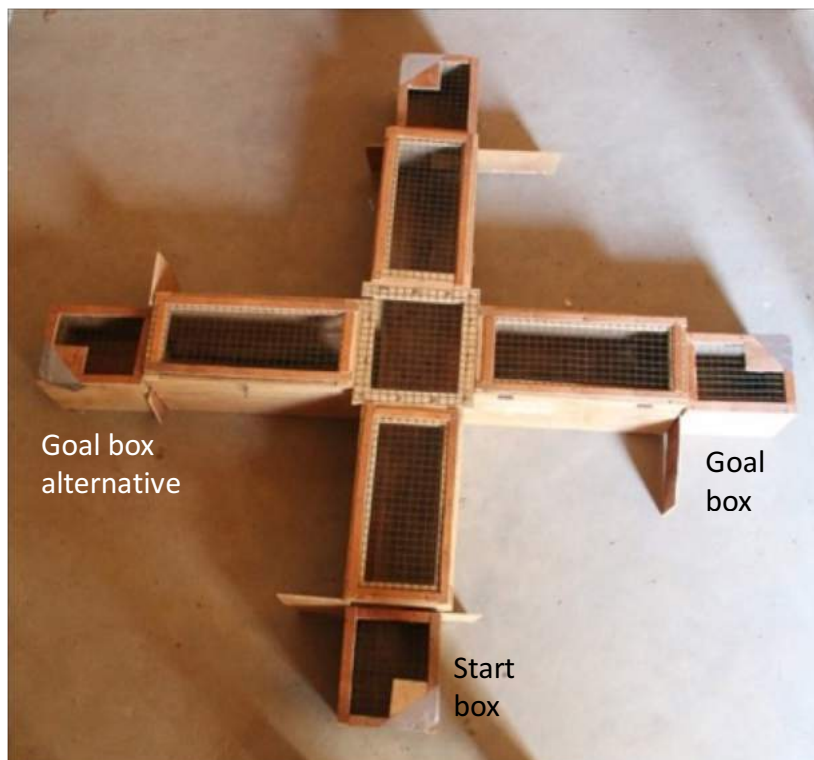

**Figure S2: The maze:** Body size of a mouse lemur corresponds approximately to one quarter of the start box (20cm x 17cm).

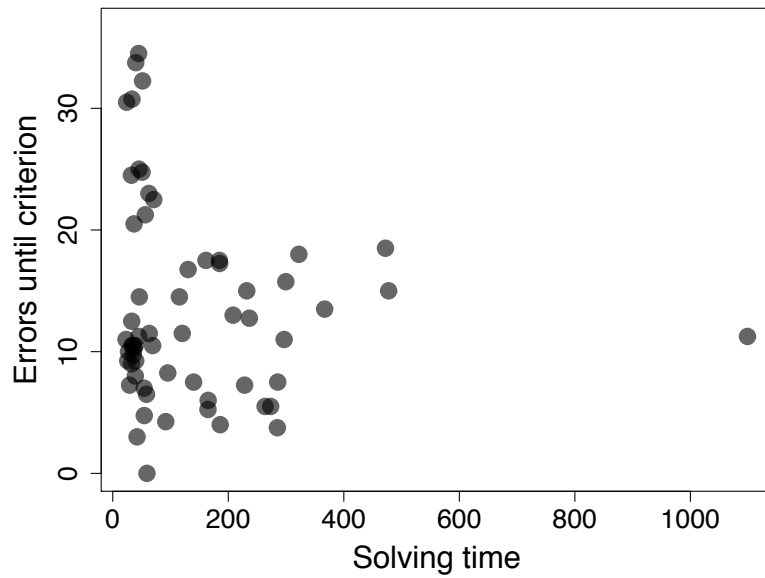

**Figure S3:** Correlation between the two main measures of cognitive performance: solving time (in seconds) in the FE task and number of errors until criterion in the maze.

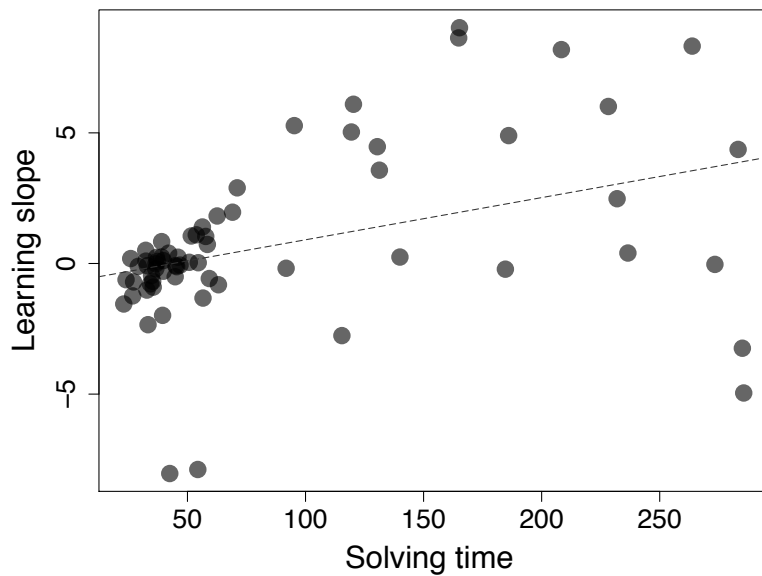

**Figure S4:** Correlation between individual learning slopes and mean solving time (in seconds) for subjects that opened at least five lids in the FE task. Learning slopes were calculated from individual regression lines of successive latencies until lid openings from first success until fifth or sixth success (i.e. time intervals between successes). Negative slopes reflect a decrease in solving latencies and suggest learning across lid openings. Spearman rank correlation ( $r = 0.46$ ,  $S = 25784$ ,  $P < 0.001$ ,  $N = 66$ ) revealed that individuals' mean solving time and learning slopes correlated positively, thus supporting the notion that for subjects with low solving times, learning is involved during the repeated opening of lids in the FE task and that individuals' mean solving times are an adequate measure to compare among subjects that differed in the number of lid opened.

## Tables

**Table S1:** Overview of studies linking cognitive performance and fitness proxies

| Species                                            | Cognitive performance               | Fitness proxy                                    | Sample size   | Relationship                                | Fitness measured in | Reference              |
|----------------------------------------------------|-------------------------------------|--------------------------------------------------|---------------|---------------------------------------------|---------------------|------------------------|
| Bumble bee, <i>Bombus terrestris</i>               | Associative learning                | Foraging success                                 | 12 colonies   | positive                                    | wild                | Raine & Chittka 2008   |
| Bumble bee, <i>Bombus terrestris</i>               | Associative learning                | Lifetime foraging performance                    | 85            | negative                                    | wild                | Evans et al. 2017      |
| Rose bitterling, <i>Rhodeus ocellatus</i>          | Spatial learning                    | Reproductive success                             | 16 males      | positive; depending on mating tactic        | captivity           | Smith et al. 2015      |
| Great tit, <i>Parus major</i>                      | Problem solving                     | Clutch size                                      | 368 females   | positive                                    | wild                | Cole et al. 2012       |
| Great tit, <i>Parus major</i>                      | Problem solving                     | Nest success                                     | 368 females   | negative                                    | wild                | Cole et al. 2012       |
| Great tit, <i>Parus major</i>                      | Problem solving                     | Adult survival                                   | 698           | none                                        | wild                | Cole et al. 2012       |
| Great tit, <i>Parus major</i>                      | Problem solving                     | Fledgling number, clutch size, nestling survival | 26 pairs      | positive                                    | wild                | Cauchard et al. 2013   |
| Great tit, <i>Parus major</i>                      | Problem solving; 2 tasks            | Hatching success, Fledgling number               | 55 pairs      | positive for 1 problem solving task         | wild                | Preisznner et al. 2016 |
| Great tit, <i>Parus major</i>                      | Problem solving; 2 tasks            | Clutch size                                      | 55 pairs      | none                                        | wild                | Preisznner et al. 2016 |
| House sparrow, <i>Passer domesticus</i>            | Problem solving                     | Nestling survival                                | 80            | none for females, positive for males (N=41) | wild                | Wetzel et al. 2017     |
| Satin bower bird, <i>Ptilonorhynchus violaceus</i> | Problem solving, 2 tasks            | Mating success                                   | 33 (25) males | positive                                    | wild                | Keagy et al. 2009      |
| Spotted bower bird,                                | PC score* from 6 tasks (Motor task, | Mating success                                   | 11            | none                                        | wild                | Isden et al. 2013      |

|                                                      |                                                                                                      |                                            |                      |                                          |      |                        |
|------------------------------------------------------|------------------------------------------------------------------------------------------------------|--------------------------------------------|----------------------|------------------------------------------|------|------------------------|
| <i>Ptilonorhynchus maculatus</i>                     | color and shape discrimination, reversal learning, spatial memory )                                  |                                            |                      |                                          |      |                        |
| Australian magpie, <i>Cracticus tibicen dorsalis</i> | PC score* from 4 tasks (inhibitory control, associative learning, reversal learning, spatial memory) | Number of clutches and fledglings per year | 22 females           | positive                                 | wild | Ashton et al. 2018     |
| African striped mouse, <i>Rhabdomys pumilio</i>      | Spatial memory                                                                                       | Survival until breeding season             | 20 males, 22 females | positive for males, negative for females | wild | Maille & Schradin 2016 |

\* Scores from principal component analysis used for the further analysis

**Table S2:** Results of the repeatability tests for measures of the FE tasks

| Performance measure | Test                   | Result      | Sample size | Interpretation     |
|---------------------|------------------------|-------------|-------------|--------------------|
| Success yes/ no     | Cohen's kappa          | Kappa= 0.42 | 13          | Moderate agreement |
| Latency success     | Intraclass correlation | ICC= 0.34   | 12          | Poor agreement     |
| Solving time        | Intraclass correlation | ICC= 0.63   | 8           | Good agreement     |

Subjects were tested in the same task with a delay of 10 to 30 days. On the group level, subjects improved in performance: Latency to success decreased by  $205 \pm 500$  sec (mean  $\pm$  sd), solving time decreased by  $72 \pm 65$  sec (mean  $\pm$  sd). Interpretation of Cohen's kappa and intraclass correlation coefficients according to Hallgren 2012.

**Table S3:** Food extraction task: results of the Generalized Linear Model (GLM) fitting the influence of BMI on success probability (success y/n)

| Predictor variable | Estimate | SE   | z     | P      |
|--------------------|----------|------|-------|--------|
| Intercept          | 2.83     | 0.70 | 4.03  | <0.001 |
| BMI <sup>a</sup>   | -1.13    | 0.41 | -2.77 | 0.006  |
| Sex (male)         | -0.93    | 0.82 | -1.13 | 0.258  |

Reference category for categorical predictor is indicated in brackets, SE: Standard error, N= 96.

<sup>a</sup> Covariate was z-transformed to a mean of= 0 and sd= 1; original mean of BMI (sd)= 2.66 (0.39).

**Table S4:** Food extraction task: results of the Generalized Linear Mixed Model (GLMM) testing the influence of BMI on individuals' number of successes

| Predictor variable | Estimate | SE   | z     | P      |
|--------------------|----------|------|-------|--------|
| (Intercept)        | 5.70     | 1.45 | 3.92  | <0.001 |
| BMI <sup>a</sup>   | -2.26    | 0.77 | -2.94 | 0.003  |
| Sex (male)         | -1.10    | 1.38 | -0.80 | 0.423  |

Reference category for categorical predictor is indicated in brackets, SE: Standard error, N= 94.

<sup>a</sup> Covariate was z-transformed to a mean of= 0 and sd= 1; original mean of BMI (sd)= 2.66 (0.39).

**Table S5:** Results of the Cox proportional hazards model fitting the effects of body mass index on latency to solve in the food extraction task

| Predictor variable | coeff | Exp(coeff) | SE(coeff) | z     | P     |
|--------------------|-------|------------|-----------|-------|-------|
| BMI <sup>a</sup>   | -0.35 | 0.71       | 0.12      | -3.03 | 0.002 |
| Sex (male)         | -0.28 | 0.76       | 0.23      | -1.19 | 0.234 |

Positive coefficients indicate a higher hazard (here solving), i.e., shorter solving latencies. Exponentially transformed coefficients are the hazard ratios and give the effect size on the hazard of predictor variables. Reference category for categorical predictor is indicated in brackets, SE: Standard error, N= 96.

<sup>a</sup> Covariate was z-transformed to a mean of= 0 and sd= 1; original mean of BMI (sd)= 2.66 (0.39).

**Table S6:** Food extraction task: results of the linear model testing the effect of body mass index at time of testing on individuals' solving time

| Predictor variable | Estimate | SE   | t     | P      |
|--------------------|----------|------|-------|--------|
| Intercept          | 4.35     | 0.17 | 25.14 | <0.001 |
| BMI <sup>a</sup>   | 0.11     | 0.12 | 0.92  | 0.359  |
| Sex (male)         | 0.10     | 0.24 | 0.43  | 0.667  |

Reference category for categorical predictor is indicated in brackets, SE: Standard error, N= 76.

<sup>a</sup> Covariate was z-transformed to a mean of= 0 and sd= 1; original mean of BMI (sd)= 2.61 (0.37).

**Table S7:** Maze: results of the Generalized Linear Model (GLM) fitting the effect of predictors on subjects' probability to reach the learning criterion

| Predictor variable | Estimate | SE   | z     | P     |
|--------------------|----------|------|-------|-------|
| Intercept          | 1.34     | 0.45 | 2.98  | 0.003 |
| BMI <sup>a</sup>   | -0.17    | 0.28 | -0.59 | 0.558 |
| Sex (male)         | -0.73    | 0.58 | -1.26 | 0.209 |

Reference category for categorical predictor is indicated in brackets, SE: Standard error, N= 73.

<sup>a</sup> Covariate was z-transformed to a mean of= 0 and sd= 1; original mean of BMI (sd)= 2.56 (0.35).

**Table S8:** Maze: results of the Cox proportional hazards model fitting the effect of predictors on individuals' number of errors until reaching the learning criterion

| Predictor variable | coeff | Exp(coeff) | SE(coeff) | z     | P     |
|--------------------|-------|------------|-----------|-------|-------|
| BMI <sup>a</sup>   | -0.09 | 0.91       | 0.13      | -0.71 | 0.479 |
| Sex (male)         | -0.20 | 0.82       | 0.28      | -0.69 | 0.488 |

Positive coefficients indicate a higher hazard (here reaching the learning criterion), i.e., fewer errors. Exponentially transformed coefficients are the hazard ratios and give the effect size of predictor variables on the hazard. Reference category for categorical predictor is indicated in brackets, SE: Standard error, N= 73.

<sup>a</sup> Covariate was z-transformed to a mean of= 0 and sd= 1; original mean of BMI (sd)= 2.56 (0.35).

**Table S9:** Relationships between performances in the maze and in the food extraction tasks tested with Spearman rank correlations and Cohen's Kappa tests

|                                     | FE:<br>Latency success                    | FE:<br>N of successes                      | FE:<br>solving time                        | FE:<br>success y/n               |
|-------------------------------------|-------------------------------------------|--------------------------------------------|--------------------------------------------|----------------------------------|
| <b>Maze: Errors until criterion</b> | R <sub>s</sub> = 0.13<br>P= 0.27<br>N= 71 | R <sub>s</sub> = -0.08<br>P= 0.49<br>N= 69 | R <sub>s</sub> = -0.08<br>P= 0.56<br>N= 61 | /                                |
| <b>Maze: criterion y/n</b>          | /                                         | /                                          | /                                          | Cohens<br>Kappa= 0.019,<br>N= 71 |

**Table S10:** Results of the linear models (LM) fitting the effects of test performance in food extraction task and maze on BMI change from the rainy to the end of dry season

|                                      | Predictor variable            | Estimate | SE   | t     | P      |
|--------------------------------------|-------------------------------|----------|------|-------|--------|
| Model 1:<br>Food extraction<br>N= 31 | Intercept                     | 0.48     | 0.08 | 5.73  | <0.001 |
|                                      | Solving time <sup>a</sup>     | 0.12     | 0.05 | 2.18  | 0.038  |
|                                      | Sex (male)                    | -0.48    | 0.11 | -4.35 | <0.001 |
|                                      | Age (juvenile)                | -0.01    | 0.11 | -0.13 | 0.900  |
| Model 2:<br>Maze<br>N= 31            | Intercept                     | 0.64     | 0.10 | 6.33  | <0.001 |
|                                      | Number of errors <sup>b</sup> | -0.12    | 0.06 | -1.97 | 0.059  |
|                                      | Sex (male)                    | -0.54    | 0.11 | -4.89 | <0.001 |
|                                      | Age (juvenile)                | -0.18    | 0.12 | -1.57 | 0.129  |

Reference categories for categorical predictors are indicated in brackets, SE: Standard error.

<sup>a</sup> Covariate was log transformed and afterwards z-transformed to a mean of= 0 and sd= 1; original mean of log(solving time) (sd)= 4.49 (0.96).

<sup>b</sup> Covariate was z-transformed to a mean of= 0 and sd=1; original mean (sd)= 13.61 (9.43).

**Table S11:** Results of the Cox proportional hazards model fitting the relationship between test performance in the food extraction task and survival

| Predictor variable        | coeff | Exp(coeff) | SE(coeff) | z     | P      |
|---------------------------|-------|------------|-----------|-------|--------|
| Solving time <sup>a</sup> | 0.09  | 1.10       | 0.15      | 0.62  | 0.534  |
| Sex (male)                | -0.72 | 0.49       | 0.31      | -2.35 | 0.019  |
| Age (juvenile)            | 1.87  | 6.50       | 0.44      | 4.28  | <0.001 |

Positive coefficients indicate a higher hazard (risk of death), i.e., a lower survival probability. Exponentially transformed coefficients are the hazard ratios and give the effect size on the hazard of predictor variables. Reference categories for categorical predictors are indicated in brackets, SE: Standard error, N= 64.

<sup>a</sup> Covariate was log transformed and afterwards z-transformed to a mean of= 0 and sd= 1; original mean of log(solving time) (sd)= 4.42 (0.93).

**Table S12:** Results of the Cox proportional hazards model fitting the relationship between test performance in the maze and survival

| Predictor variable            | coeff | Exp(coeff) | SE(coeff) | z     | P      |
|-------------------------------|-------|------------|-----------|-------|--------|
| Number of errors <sup>a</sup> | -0.04 | 0.97       | 0.16      | -0.23 | 0.824  |
| Sex (male)                    | -0.75 | 0.47       | 0.31      | -2.45 | 0.014  |
| Age (juvenile)                | 1.69  | 5.41       | 0.46      | 3.63  | <0.001 |

Positive coefficients indicate a higher hazard (risk of death), i.e., a lower survival probability. Exponentially transformed coefficients are the hazard ratios and give the effect size on the hazard of predictor variables. Reference categories for categorical predictors are indicated in brackets, SE: Standard error, N= 62.

<sup>a</sup> Covariate was z-transformed to a mean= 0 and sd= 1; original mean (sd)= 14.81 (9.27)

## References

- Ashton** BJ, Ridley AR, Edwards EK, Thornton A. 2018. Cognitive performance is linked to group size and affects fitness in Australian magpies. *Nature* **554**, 364–7. doi:10.1038/nature25503.
- Cole** EF, Morand-Ferron J, Hinks AE, Quinn JL. 2012. Cognitive ability influences reproductive life history variation in the wild. *Curr Biol* **22**, 1808–12. doi:10.1016/j.cub.2012.07.051.
- Cauchard** L, Boogert NJ, Lefebvre L, Dubois F, Doligez B. 2013. Problem-solving performance is correlated with reproductive success in a wild bird population. *Anim Behav* **85**, 19–26. doi:10.1016/j.anbehav.2012.10.005.
- Evans** LJ, Smith KE, Raine NE. 2017. Fast learning in free-foraging bumble bees is negatively correlated with lifetime resource collection. *Sci Rep* **7**, 1–10. doi:10.1038/s41598-017-00389-0.
- Hallgren** KA. 2012. Computing Inter-Rater Reliability for Observational Data: An Overview and Tutorial. *Tutor Quant Methods Psychol* **8**, 23-34.
- Isden** J, Panayi C, Dingle C, Madden J. 2013. Performance in cognitive and problem-solving tasks in male spotted bowerbirds does not correlate with mating success. *Anim Behav* **86**, 829–38. doi:10.1016/j.anbehav.2013.07.024.
- Keagy** J, Savard J-F, Borgia G. 2009. Male satin bowerbird problem-solving ability predicts mating success. *Anim Behav* **78**, 809–17. doi:10.1016/j.anbehav.2009.07.011.

- Maille** A, Schradin C. 2016. Survival is linked with reaction time and spatial memory in African striped mice. *Biol Lett* **12**, 20160346.
- Preiszner** B, Papp S, Pipoly I, Seress G, Vincze E, Liker A, Bokony V. 2016. Problem-solving performance and reproductive success of great tits in urban and forest habitats. *Anim Cogn* **20**, 53–63. doi:10.1007/s10071-016-1008-z.
- Raine** NE, Chittka L. 2008. The correlation of learning speed and natural foraging success in bumblebees. *Proc R Soc Lond B Biol Sci* **275** (1636), 803–808.
- Smith** C, Philips A, Reichard M. 2015. Cognitive ability is heritable and predicts the success of an alternative mating tactic. *Proc R Soc Lond B Biol Sci* **282**, 20151046. doi:10.1098/rspb.2015.1046.
- Wetzel** DP. 2017. Problem-solving skills are linked to parental care and offspring survival in wild house sparrows. *Ethology* **123**, 475–83. doi:10.1111/eth.12618.
